# Supplementary material
Source: publisher site journal article supplement (https://www.dovepress.com/article/427976)
Supplement: Supplementary file 1 [file get_supplementary_file.php]

Institutional Review Boards and Independent Ethics Committees that approved the study at each site:

Advarra IRB (formerly Quorum IRB) (USA); Bioethics Committee at Bydgoszcz Medical Chamber (Poland); Drug Research Ethics Committee Clinical Pharmacology Service St. Eloi Hospital (France); Ethics Committee of San Carlos Clinical Hospital (Spain); The Health Research Ethics Committees for Capital Region (Denmark); Human Research Ethics Committee of Thammasat University No. 1 (Faculty of Medicine) (Thailand); Local Ethics Committee of the BUZ OO (Budget Institution Health Care in Omsk Area) Clinical Ophthalmic Hospital (Russia); Local Ethics Committee of the National Medical Research Center Intersectoral Scientific Techno Complex Microsurgery of the Eye (Russia); Research Ethics Committee of the Faculty of Medicine Chiang Mai University (Thailand); SingHealth Centralised Institutional Review Board (Singapore); and Western IRB (USA)
